# Supplementary material for: Association of plasma tryptophan concentration with periaqueductal gray matter functional connectivity in migraine patients
Source: PubMed Central journal article supplement (PMC8760301; doi:10.1038/s41598-021-04647-0), 2022-01-14
Supplement: 41598_2021_4647_MOESM1_ESM.pdf [file 41598_2021_4647_MOESM1_ESM.pdf]

## Supplementary Information

### Association of plasma tryptophan concentration with periaqueductal gray matter functional connectivity in migraine patients

Kinga Gecse<sup>1,2</sup>, Dóra Dobos<sup>1,2</sup>, Csaba Sándor Aranyi<sup>3</sup>, Attila Galambos<sup>2,4</sup>, Daniel Baksa<sup>1,2</sup>, Natália Kocsel<sup>2,4</sup>, Edina Szabó<sup>2,4,5</sup>, Dorka Papp<sup>2</sup>, Dávid Virág<sup>6</sup>, Krisztina Ludányi<sup>6</sup>, Gyöngyi Kökönyei<sup>1,2,4</sup>, Miklós Emri<sup>3</sup>, György Bagdy<sup>1,7,8</sup>, Gabriella Juhasz<sup>1,2</sup>

<sup>1</sup> Department of Pharmacodynamics, Faculty of Pharmacy, Semmelweis University, Budapest, Hungary

<sup>2</sup> SE-NAP2 Genetic Brain Imaging Migraine Research Group, Hungarian Brain Research Program, Semmelweis University, Budapest, Hungary

<sup>3</sup> Division of Nuclear Medicine and Translational Imaging, Department of Medical Imaging, Faculty of Medicine, University of Debrecen, Debrecen, Hungary

<sup>4</sup> Institute of Psychology, ELTE Eötvös Loránd University, Budapest, Hungary

<sup>5</sup> Center for Pain and the Brain (PAIN Research Group), Department of Anesthesiology, Critical Care and Pain Medicine, Boston Children's Hospital, Harvard Medical School, Boston, MA, United States of America

<sup>6</sup> Department of Pharmaceutics, Faculty of Pharmacy, Semmelweis University, Budapest, Hungary

<sup>7</sup> NAP-2-SE New Antidepressant Target Research Group, Hungarian Brain Research Program, Semmelweis University, Budapest, Hungary

<sup>8</sup> MTA-SE Neuropsychopharmacology and Neurochemistry Research Group, Hungarian Academy of Sciences, Semmelweis University, Budapest, Hungary

#### Corresponding author:

Gabriella Juhasz

Postal address: Department of Pharmacodynamics, Faculty of Pharmacy, Semmelweis University, Budapest, Hungary, 1089 Budapest, Nagyvarad ter 4. Hungary.

Phone: +36-1-4591500/56362

Fax: +36-1-4591494

E-mail: juhasz.gabriella@pharma.semmelweis-univ.hu

**Supplementary Table S1.** Descriptive characteristics of participants in the sex matched case control design

|                                          | Migraine       | Control        | Test-statistic | p-value |
|------------------------------------------|----------------|----------------|----------------|---------|
| <b>Sex</b>                               | F=21, M=6      | F=21, M=6      | $\chi^2 = 0$   | 1       |
| <b>Age (years)</b>                       | 25.9 ± 4.6     | 25.6 ± 4.0     | U = 362        | p=0.965 |
| <b>TRP (µg/ml)</b>                       |                |                |                |         |
| 1.Blood Sample                           | 9.32 ± 2.88    | 7.12 ± 3.52    | U = 136        | 0.002   |
| 2.Blood Sample                           | 9.07 ± 2.66    | 7.52 ± 2.27    | t(2,21)=4.78   | 0.032   |
| Mean                                     | 9.16 ± 2.35    | 7.33 ± 2.51    | F(1,53)=9.467  | 0.003*  |
| <b>LNAA (µg/ml)</b>                      |                |                |                |         |
| 1.Blood Sample                           | 108.79 ± 37.00 | 116.80 ± 33.62 | U=228          | 0.219   |
| 2.Blood Sample                           | 101.67 ± 30.85 | 115.10 ± 28.80 | t(44)=-1.50    | 0.140   |
| Mean                                     | 104.15 ± 28.09 | 117.45 ± 26.56 | F(1,53)=3.886  | 0.054** |
| <b>Zung</b>                              | 35.27 ± 5.34   | 33.44 ± 7.05   | t(52)=1.065    | 0.292   |
| <b>STAI-T</b>                            | 39.34 ± 8.63   | 37.63 ± 10.85  | t(52)=0.639    | 0.526   |
| <b>Age of migraine onset (years)</b>     | 14.65 ± 1.2    | NA             |                |         |
| <b>Migraine attack frequency (month)</b> | 3.51 ± 0.57    | NA             |                |         |

*Note.* Data are expressed as mean value ± SD. The *p* values are based on Pearson chi-square tests for sex, Mann-Whitney U tests for Age, 1. blood sample of TRP and LNAA, and Independent samples t-test for 2. blood sample of TRP and LNAA, STAI-T and Zung. \*The difference of mean tryptophan concentration between migraine and control groups was corrected for age, sex and plasma LNAA level using univariate ANOVA.

\*\*The difference of mean LNAA level between migraine and control groups was corrected for age and sex using univariate ANOVA.

LNAA: Large neutral amino-acids, N: Number of participants, F: Female, M: Male, STAI-T: Trait-anxiety level scores, TRP: L-tryptophan plasma concentration, Zung: Depressive symptoms scores, Significance threshold:  $p < 0.05$ ,

**Supplementary Table S2.** Intrinsic functional connectivity of left and right side of PAG in the sex matched case control design

| Seed region | Region              | Cluster size (voxel) | Peak T- value | MNI coordinates (x y z) |     |     |
|-------------|---------------------|----------------------|---------------|-------------------------|-----|-----|
| Left PAG    | R Thalamus          | 324                  | 4.37          | 10                      | -28 | -2  |
|             | R Precuneus         | 139                  | 4.85          | 4                       | -70 | 54  |
| Right PAG   | R Thalamus          | 514                  | 19.87         | 12                      | -22 | 10  |
|             | L Cerebellum Crus 1 | 1576                 | 5.42          | -40                     | -52 | -34 |
|             | L Cerebellum_VI     |                      | 4.62          | -12                     | -68 | -26 |
|             | L Cerebellum Crus 2 |                      | 3.86          | -38                     | -70 | -44 |
|             | L Vermis VI         |                      | 3.73          | -4                      | -58 | -22 |
|             | R Cerebellum VI     | 428                  | 4.41          | 26                      | -62 | -30 |
|             | R Cerebellum Crus 1 |                      | 3.60          | 32                      | -56 | -36 |
|             | R Cerebellum VIII   |                      | 3.49          | 18                      | -64 | -38 |

*Note.* Results are corrected for age and sex. All the listed clusters showed significant positive correlations with PAG, while no negative correlation survived the cluster-level  $p_{FWE} < 0.05$  significance threshold.

R: right, L: left, MNI: Montreal Neurological Institute

**Supplementary Table S3.** Alterations of PAG connectivity in association with migraine frequency, migraine onset, trait-anxiety level and depressive symptoms in migraine patients with and without correction for plasma tryptophan concentration

| Without correction for tryptophan concentration |              |              |                         |     |     | After correction for tryptophan concentration |              |              |                         |     |    |
|-------------------------------------------------|--------------|--------------|-------------------------|-----|-----|-----------------------------------------------|--------------|--------------|-------------------------|-----|----|
| Region                                          | Cluster-size | Peak T-value | MNI-coordinates (x y z) |     |     | Region                                        | Cluster-size | Peak T-value | MNI-coordinates (x y z) |     |    |
| <b>Attack frequency</b>                         |              |              |                         |     |     | <b>Attack frequency</b>                       |              |              |                         |     |    |
| <i>Left PAG: Positive correlation</i>           |              |              |                         |     |     | <i>Left PAG: Positive correlation</i>         |              |              |                         |     |    |
| R Triangular part of inferior frontal gyrus     | 181          | 5.68         | 50                      | 40  | 10  | R Triangular part of inferior frontal gyrus   | 232          | 7.12         | 50                      | 40  | 10 |
| R Middle frontal gyrus                          | 141          | 5.04         | 24                      | 48  | 4   | R Middle frontal gyrus                        | 3.98         | 54           | 34                      | 22  |    |
| <i>Right PAG: Positive correlation</i>          |              |              |                         |     |     | <i>Right PAG: Positive correlation</i>        |              |              |                         |     |    |
| R Triangular part of inferior frontal gyrus     | 272          | 5.4          | 50                      | 28  | 26  | R Triangular part of inferior frontal gyrus   | 271          | 5.47         | 50                      | 28  | 26 |
| R Middle frontal gyrus                          | 161          | 5.21         | 24                      | 50  | 4   | R Superior frontal gyrus                      | 126          | 4.07         | 32                      | 58  | 14 |
| <b>Age of onset</b>                             |              |              |                         |     |     | <b>Age of onset</b>                           |              |              |                         |     |    |
| <i>Left PAG: Positive correlation</i>           |              |              |                         |     |     | <i>Left PAG: Positive correlation</i>         |              |              |                         |     |    |
| R Precuneus                                     | 197          | 5.23         | 14                      | -44 | 4   | R Lingual gyrus                               | 289          | 5.45         | 14                      | 46  | 4  |
| R Lingual gyrus                                 |              | 4.31         | 6                       | -56 | 4   | R Cuneus                                      | 4.94         | 6            | 66                      | 20  |    |
| R Cuneus                                        |              | 4.18         | 6                       | -64 | 20  |                                               |              |              |                         |     |    |
| <b>Trait-anxiety</b>                            |              |              |                         |     |     | <b>Trait-anxiety</b>                          |              |              |                         |     |    |
| <i>Left PAG: Positive correlation</i>           |              |              |                         |     |     | No significant result                         |              |              |                         |     |    |
| L Middle frontal gyrus                          | 166          | 5.33         | -30                     | 56  | 28  |                                               |              |              |                         |     |    |
| <i>Right PAG: Positive correlation</i>          |              |              |                         |     |     |                                               |              |              |                         |     |    |
| L Middle frontal gyrus                          | 190          | 5.73         | -26                     | 54  | 30  |                                               |              |              |                         |     |    |
| L Superior medial frontal gyrus                 | 123          | 5.09         | -4                      | 36  | 32  |                                               |              |              |                         |     |    |
| <b>Depressive symptoms</b>                      |              |              |                         |     |     | <b>Depressive symptoms</b>                    |              |              |                         |     |    |
| <i>Left PAG: Positive correlation</i>           |              |              |                         |     |     | <i>Left PAG: Negative correlation</i>         |              |              |                         |     |    |
| L Middle frontal gyrus                          | 283          | 6.65         | -26                     | 54  | 28  | R Middle cingulate gyrus                      | 206          | -4.08        | 4                       | -40 | 42 |
| <i>Left PAG: Negative correlation</i>           |              |              |                         |     |     | <i>L Precuneus</i>                            |              |              |                         |     |    |
| R Fusiform gyrus                                | 158          | -4.89        | 26                      | -40 | -18 |                                               |              | -4.44        | -10                     | 56  | 26 |
| R Parahippocampal gyrus                         |              | -4.14        | 30                      | -30 | -16 |                                               |              |              |                         |     |    |
| <i>Right PAG: Positive correlation</i>          |              |              |                         |     |     |                                               |              |              |                         |     |    |
| L Middle frontal gyrus                          | 309          | 6.70         | -26                     | 54  | 30  |                                               |              |              |                         |     |    |

*Note.* Significance threshold was cluster-level  $p_{FWE} < 0.05$  including at least 20 contiguous voxels. Results are corrected for age, sex and LNAA concentration. R: right, L: left, MNI: Montreal Neurological Institute

**Supplementary Table S4.** Association between PAG intrinsic functional resting-state connectivity and plasma tryptophan concentration in migraine patients after correction for trait-anxiety or depressive symptoms.

| Region                                          | Cluster-size | Peak T-value | MNI-coordinates<br>(x y z) |     |     |
|-------------------------------------------------|--------------|--------------|----------------------------|-----|-----|
| <b>After correction for trait-anxiety level</b> |              |              |                            |     |     |
| Left PAG                                        |              |              |                            |     |     |
| <i>Negative correlation</i>                     |              |              |                            |     |     |
| L Fusiform gyrus                                | 143          | - 6.86       | -32                        | -40 | -22 |
| Right PAG                                       |              |              |                            |     |     |
| <i>Positive correlation</i>                     |              |              |                            |     |     |
| L Superior frontal gyrus                        | 155          | 6.12         | 20                         | 44  | 32  |
| L Middle frontal gyrus                          |              | 4.43         | 26                         | 38  | 30  |
| <i>Negative correlation</i>                     |              |              |                            |     |     |
| L Fusiform gyrus                                | 162          | -4.15        | -40                        | -46 | -24 |
| <b>After correction for depressive symptoms</b> |              |              |                            |     |     |
| Left PAG                                        |              |              |                            |     |     |
| <i>Negative correlation</i>                     |              |              |                            |     |     |
| L Fusiform gyrus                                | 133          | -6.65        | -32                        | -38 | -22 |
| Right PAG                                       |              |              |                            |     |     |
| <i>Positive correlation</i>                     |              |              |                            |     |     |
| R Superior frontal gyrus                        | 175          | 6.74         | 20                         | 44  | 32  |
| R Superior medial part of Frontal gyrus         |              | 4.37         | 8                          | 56  | 38  |
| <i>Negative correlation</i>                     |              |              |                            |     |     |
| L Fusiform gyrus                                | 135          | -3.89        | -40                        | -46 | -24 |

*Note.* Significance threshold was cluster-level  $p_{FWE} < 0.05$  including at least 20 contiguous voxels. Results are corrected for age, sex and LNAA concentration. R: right, L: left, MNI: Montreal Neurological Institute

**Supplementary Table S5** Descriptive characteristics of participants in the extended unbalanced sample

|                                          | 1. Blood Sample |                        | Test statistic   | p-value |
|------------------------------------------|-----------------|------------------------|------------------|---------|
| <b>Total</b>                             | 74              |                        |                  |         |
| <b>Diagnosis</b>                         | Migraine        | Control                |                  |         |
| <b>N</b>                                 | 31              | 43                     |                  |         |
| <b>Sex</b>                               | F=25, M=6       | F=19, M=24             | $\chi^2=4.965$   | 0.026   |
| <b>Age (years)</b>                       | 26.71 ± 4.84    | 25.91 ± 4.06           | U=614            | 0.564   |
| <b>TRP (µg/ml)</b>                       | 9.48 ± 2.92     | 7.85 ± 3.14            | U=423            | 0.008   |
| <b>LNAA (µg/ml)</b>                      | 111.49±35.20    | 116.86±32.40           | U=573            | 0.306   |
| <b>Age of migraine onset (years)</b>     | 14.52 ± 1.14    | NA                     |                  |         |
| <b>Migraine attack frequency (month)</b> | 3.33 ± 0.50     | NA                     |                  |         |
| <b>2. Blood Sample</b>                   |                 |                        |                  |         |
| <b>Total</b>                             | 68              |                        |                  |         |
| <b>Diagnosis</b>                         | Migraine        | Control                |                  |         |
| <b>N</b>                                 | 27              | 41                     |                  |         |
| <b>Sex</b>                               | F=21, M=6       | F=17, M=24             | $\chi^2 =2.693$  | 0.101   |
| <b>Age (years)</b>                       | 26.19 ± 4.73    | 25.44 ± 3.96           | U=515            | 0.628   |
| <b>TRP (µg/ml)</b>                       | 9.07 ± 2.66     | 7.42 ± 2.1             | U=333            | 0.006   |
| <b>LNAA (µg/ml)</b>                      | 101.67±30.85    | 110.80±27.46           | U=410            | 0.114   |
| <b>Age of migraine onset (years)</b>     | 14.85 ± 1.15    | NA                     |                  |         |
| <b>Migraine attack frequency (month)</b> | 3.40 ± 0.56     | NA                     |                  |         |
| <b>Resting-state fMRI</b>                |                 |                        |                  |         |
| <b>Total</b>                             | 64              |                        |                  |         |
| <b>Diagnosis</b>                         | Migraine        | Control                |                  |         |
| <b>N</b>                                 | 27              | 37                     |                  |         |
| <b>Sex</b>                               | F=21, M=6       | F=21, M=16             | $\chi^2=3.058$   | 0.080   |
| <b>Age (years)</b>                       | 25.9 ± 4.6      | 25.7 ± 4.3             | U=493            | 0.929   |
| <b>TRP (µg/ml)</b>                       | 9.16 ± 2.35     | 7.51 ± 2.34            | $F(1,63)=10.005$ | 0.002*  |
| <b>LNAA (µg/ml)</b>                      | 103.14±26.69    | 117.11±23.44           | U=360            | 0.058   |
| <b>Age of migraine onset (years)</b>     | 14.65 ± 1.2     | NA                     |                  |         |
| <b>Migraine attack frequency (month)</b> | 3.51 ± 0.57     | NA                     |                  |         |
| <b>STAI-T</b>                            | 39.34 ±8.63     | 37.66 ± 10.47 (N = 35) | $t(60)=0.980$    | 0.503   |
| <b>ZUNG</b>                              | 35.27 ± 5.34    | 33.73 ± 6.72 (N = 35)  | $t(60)=0.674$    | 0.331   |

*Note.* Data are expressed as mean value ± SD. The *p* values are based on Pearson chi-square tests for sex, Mann-Whitney U tests for Age, TRP, LNAA, and Independent samples t-test for STAI-T and Zung. \*The difference of mean tryptophan concentration between migraine and control groups was corrected for age, sex and plasma LNAA level in the resting state fMRI group using univariate ANOVA. LNAA: Large neutral amino-acids, N: Number of participants, F: Female, M: Male, Significance threshold:  $p < 0.05$ , STAI-T: Trait-anxiety level scores, TRP: L-tryptophan plasma concentration, Zung: Depressive symptoms scores

**Supplementary Table S6.** Intrinsic functional connectivity of left and right side of PAG in the extended sample (27 migraineurs and 37 controls)

| Seed region | Region                                | Cluster size (voxel) | Peak T- value   | MNI coordinates (x y z) |      |     |     |     |
|-------------|---------------------------------------|----------------------|-----------------|-------------------------|------|-----|-----|-----|
| Left PAG    | L Thalamus                            | 1435                 | 4.44            | -12                     | -26  | -8  |     |     |
|             | R Thalamus                            |                      | 4.35            | 12                      | -18  | 12  |     |     |
|             | L Caudate                             |                      | 4.15            | -10                     | 4    | 12  |     |     |
|             | L Superior frontal gyrus              |                      | 4.90            | -26                     | 62   | 10  |     |     |
|             | L Middle frontal gyrus                |                      | 3.68            | -24                     | 60   | 16  |     |     |
|             | L Superior frontal gyrus, medial part |                      | 3.64            | -12                     | 66   | 10  |     |     |
|             | L Cerebellum Crus2                    |                      | 426             | 4.54                    | -40  | -68 | -42 |     |
|             | L Cerebellum_VI                       |                      |                 | 4.24                    | -28  | -58 | -36 |     |
|             | L Cerebellum Crus1                    |                      |                 | 4.16                    | -42  | 68  | -32 |     |
|             | L Cuneus                              |                      |                 | 316                     | 4.17 | -2  | -68 | 24  |
|             | L Precuneus                           |                      | 3.21            |                         | -12  | -66 | 38  |     |
|             | R Middle frontal gyrus                |                      | 277             | 4.10                    | 42   | 6   | 56  |     |
|             |                                       |                      |                 | 3.88                    | 36   | 12  | 46  |     |
|             |                                       |                      | L Vermis_VI     | 268                     | 4.22 | -2  | -58 | -24 |
|             |                                       |                      | L Cerebellum_VI |                         | 4.15 | -8  | -66 | -22 |
|             |                                       |                      | R Vermis_VII    |                         | 3.74 | 4   | -74 | -24 |
| Right PAG   | R Thalamus                            | 1567                 | 4.78            | 12                      | -18  | 12  |     |     |
|             | L Thalamus                            |                      | 3.73            | -14                     | -26  | 8   |     |     |
|             | L Cerebellum Crus2                    | 2654                 | 4.99            | -36                     | -68  | -40 |     |     |
|             | L Cerebellum_VI                       |                      | 4.68            | -28                     | -60  | -34 |     |     |
|             | L Cerebellum_IV_V                     |                      | 4.25            | -6                      | -60  | -22 |     |     |
|             | L Superior frontal gyrus              | 167                  | 4.42            | -26                     | 62   | 10  |     |     |
|             | L Middle frontal gyrus                |                      | 3.47            | -26                     | 48   | 16  |     |     |
|             | R Caudate                             | 215                  | 4.09            | 10                      | 6    | 6   |     |     |
|             | R Pallidum                            |                      | 4.02            | 22                      | 0    | 6   |     |     |
|             | L Precuneus                           | 323                  | 4.21            | -4                      | -70  | 30  |     |     |
|             | L Cuneus                              |                      | 4.12            | -2                      | -68  | 22  |     |     |
|             | R Middle frontal gyrus                | 237                  | 4.18            | 44                      | 26   | 32  |     |     |

*Note.* Results are corrected for age and sex. All the listed clusters showed significant positive correlations with PAG, while no negative correlation survived the cluster-level  $p_{FWE} < 0.05$  significance threshold.

R: right, L: left, MNI: Montreal Neurological Institute

**Supplementary Table S7** Significantly different association between PAG intrinsic functional resting-state connectivity and plasma tryptophan concentration in the extended unbalanced sample (27 migraine patients compared to 37 controls)

| Region                     | Cluster size<br>(voxel) | Peak F-<br>value | MNI coordinates<br>(x y z) |     |     |
|----------------------------|-------------------------|------------------|----------------------------|-----|-----|
| <b>Left PAG</b>            |                         |                  |                            |     |     |
| R Middle Occipital gyrus   | 1020                    | 21.64            | 28                         | -92 | 20  |
| L Middle Occipital gyrus   | 944                     | 19.07            | -20                        | -88 | 20  |
| L Superior Occipital gyrus |                         | 17.39            | -16                        | -86 | 30  |
| L Fusiform gyrus           | 916                     | 20.98            | -36                        | -52 | -18 |
| L Cerebellum IV-V          |                         | 20.83            | -6                         | -64 | -6  |
| R Fusiform gyrus           | 334                     | 14.67            | 34                         | -38 | -24 |
| <b>Right PAG</b>           |                         |                  |                            |     |     |
| L Fusiform gyrus           | 146                     | 25.94            | -34                        | -66 | -12 |
| L Cerebellum VI            |                         | 14.5             | -22                        | -62 | -14 |
| L Middle Occipital gyrus   | 123                     | 20.61            | -36                        | -76 | 8   |

*Note.* Significance threshold was cluster-level  $p_{FWE} < 0.05$  including at least 20 contiguous voxels. Results are corrected for age, sex and LNAA concentration. R: right, L: left, MNI: Montreal Neurological Institute



**Supplementary Table S8** Significantly different association between PAG intrinsic functional resting-state connectivity and plasma tryptophan concentration in migraine patients compared to controls using PAG as a single seed

| Region                     | Cluster size<br>(voxel) | Peak F-<br>value | MNI coordinates<br>(x y z) |     |     |
|----------------------------|-------------------------|------------------|----------------------------|-----|-----|
| L Fusiform gyrus           | 1060                    | 31.18            | -44                        | -70 | -18 |
| L Cerebellum IV-V          |                         | 24.06            | -6                         | -64 | -6  |
| R Fusiform gyrus           | 1176                    | 23.14            | 30                         | -46 | -16 |
| R Middle Occipital gyrus   |                         | 23.79            | 28                         | 92  | 20  |
| L Middle Occipital gyrus   | 696                     | 20.54            | -28                        | -84 | 15  |
| L Superior Occipital gyrus |                         | 17.44            | -14                        | -96 | 24  |

Note. Significance threshold was cluster-level pFWE < 0.05 including at least 20 contiguous voxels. Results are corrected for age, sex and LNAA concentration. MNI: Montreal Neurological Institute

**Supplementary Table S9** Significant association between PAG intrinsic functional resting-state connectivity and plasma tryptophan concentration in migraine patients using a single seed for PAG

| Region                                  | Cluster size<br>(voxel) | Peak T-<br>value | MNI coordinates<br>(x y z) |     |     |
|-----------------------------------------|-------------------------|------------------|----------------------------|-----|-----|
| <i>Negative correlation</i>             |                         |                  |                            |     |     |
| L Fusiform gyrus                        | 718                     | -6.76            | -32                        | -48 | -18 |
| R Fusiform gyrus                        | 191                     | -6.10            | 28                         | -44 | -18 |
| R Cerebellum VI                         |                         | -4.65            | 34                         | -44 | -26 |
| L Middle Occipital gyrus                | 210                     | -5.38            | -24                        | -84 | 14  |
| <i>Positive correlation</i>             |                         |                  |                            |     |     |
| R Superior medial part of Frontal gyrus | 224                     | 5.05             | 10                         | 54  | 36  |
| L Superior medial part of Frontal gyrus | 199                     | 4.93             | -2                         | 34  | 34  |
| L Superior Frontal gyrus                | 183                     | 6.11             | -18                        | 48  | 36  |

Note. Significance threshold was cluster-level pFWE < 0.05 including at least 20 contiguous voxels. Results are corrected for age, sex and LNAA concentration. MNI: Montreal Neurological Institute

**Supplementary Table S10** Alterations of PAG connectivity in association with migraine frequency, migraine onset, trait-anxiety level and depressive symptoms in migraine patients with and without correction for plasma tryptophan concentration, using PAG as a single seed

| Without correction for tryptophan concentration |              |              |                         |     |     | After correction for tryptophan concentration |              |              |                         |     |    |
|-------------------------------------------------|--------------|--------------|-------------------------|-----|-----|-----------------------------------------------|--------------|--------------|-------------------------|-----|----|
| Region                                          | Cluster-size | Peak T-value | MNI-coordinates (x y z) |     |     | Region                                        | Cluster-size | Peak T-value | MNI-coordinates (x y z) |     |    |
| <b>Attack frequency</b>                         |              |              |                         |     |     | <b>Attack frequency</b>                       |              |              |                         |     |    |
| <i>Positive correlation</i>                     |              |              |                         |     |     | Left PAG: <i>Positive correlation</i>         |              |              |                         |     |    |
| R Middle frontal gyrus                          | 162          | 5.03         | 24                      | 50  | 4   | R Triangular part of inferior frontal gyrus   | 286          | 6.29         | 50                      | 40  | 10 |
| R Triangular part of inferior frontal gyrus     | 273          | 5.17         | 50                      | 40  | 10  | R Middle frontal gyrus                        |              | 4.41         | 54                      | 34  | 22 |
| <b>Age of onset</b>                             |              |              |                         |     |     | <b>Age of onset</b>                           |              |              |                         |     |    |
| <i>Positive correlation</i>                     |              |              |                         |     |     | Left PAG: <i>Positive correlation</i>         |              |              |                         |     |    |
| R Lingual gyrus R                               | 179          | 4.93         | 14                      | -46 | 4   | R Lingual gyrus                               | 225          | 5.04         | 14                      | -46 | 4  |
| R Precuneus                                     |              | 4.14         | 12                      | -64 | 24  |                                               |              |              |                         |     |    |
| <b>Trait-anxiety</b>                            |              |              |                         |     |     | <b>Trait-anxiety</b>                          |              |              |                         |     |    |
| <i>Positive correlation</i>                     |              |              |                         |     |     | <i>No significant results</i>                 |              |              |                         |     |    |
| L Middle frontal gyrus                          | 213          | 5.58         | -26                     | 54  | 30  |                                               |              |              |                         |     |    |
| L Superior medial frontal gyrus                 | 129          | 5.13         | -4                      | 36  | 32  |                                               |              |              |                         |     |    |
| <b>Depressive symptoms</b>                      |              |              |                         |     |     | <b>Depressive symptoms</b>                    |              |              |                         |     |    |
| <i>Positive correlation</i>                     |              |              |                         |     |     | <i>No significant results</i>                 |              |              |                         |     |    |
| L Middle frontal gyrus                          | 314          | 6.73         | -26                     | 54  | 28  |                                               |              |              |                         |     |    |
| <i>Negative correlation</i>                     |              |              |                         |     |     |                                               |              |              |                         |     |    |
| R Fusiform gyrus                                | 146          | -5.49        | 26                      | -40 | -18 |                                               |              |              |                         |     |    |
| R Hippocampus                                   |              | -4.28        | 34                      | -26 | -10 |                                               |              |              |                         |     |    |

*Note.* Significance threshold was cluster-level  $p_{FWE} < 0.05$  including at least 20 contiguous voxels. Results are corrected for age, sex and LNAA concentration. MNI: Montreal Neurological Institute

## Preprocessing pipeline

Freesurfer (version 5.3) (<http://surfer.nmr.mgh.harvard.edu/>) was used to perform intensity non-uniformity correction and intensity normalization on the T1-weighted images. The Freesurfer workflow also segmented the structural images to extract the brain volume and to separate white matter and gray matter tissues from cerebrospinal fluid (CSF). Spatial normalization was performed with the ANTs registration tool <sup>1</sup>, which transformed the extracted brain volumes to match the 2 mm isovoxel brain template in MNI152 space provided by the Montreal Neurological Institute (MNI). The first four frames of the fMRI time-series were deleted from further processing to remove variance introduced while magnetization stabilized. Primary motion correction was performed using the MCFLIRT <sup>2</sup> utility of the FMRIB's Software Library (FSL version 6.0), by moving every image with rigid-body transformation to the first volume of the time-series. The six movement parameters were completed with the movement at the previous time point and with the squared value of each obtained parameter <sup>3</sup>. These 24 time-invariant variables were used at later steps to reduce motion artefacts in the data. For spatial standardization the functional images were coregistered with the corresponding subject's structural scan with the FSL linear registration tool, then transformed them into MNI152 space using the same transformation we normalized the T1 images with. CompCor technique <sup>4</sup> was investigated to compute the first five principal components of fMRI time-series within the white matter and CSF, which are considered to describe uninteresting variance regarding cortical activation. Then spatial filtering was applied with the FSL application SUSAN <sup>5</sup>, using a Gaussian-kernel of 6 mm full-width at half maximum. Further signal correction was performed with the independent component analysis based ICA-AROMA <sup>6</sup>, and we linearly regressed the 24 parameters derived from primary motion correction and the 5 CompCor components from the data. Four subjects were excluded due to excessive movements defined as frame-wise relative RMS displacement > 0.25 mm in more than 20 volumes <sup>7</sup>. Finally, temporal band-pass filtering was applied between 0.009 Hz and 0.08 Hz to remove noise and eliminate signal drifting effects.

## References

- 1 Avants, B. B., Epstein, C. L., Grossman, M. & Gee, J. C. Symmetric diffeomorphic image registration with cross-correlation: evaluating automated labeling of elderly and neurodegenerative brain. *Medical image analysis* **12**, 26-41, doi:10.1016/j.media.2007.06.004 (2008).
- 2 Jenkinson, M., Bannister, P., Brady, M. & Smith, S. Improved optimization for the robust and accurate linear registration and motion correction of brain images. *Neuroimage* **17**, 825-841, doi:10.1016/s1053-8119(02)91132-8 (2002).
- 3 Friston, K. J., Williams, S., Howard, R., Frackowiak, R. S. & Turner, R. Movement-related effects in fMRI time-series. *Magnetic resonance in medicine* **35**, 346-355, doi:10.1002/mrm.1910350312 (1996).

- 4 Behzadi, Y., Restom, K., Liau, J. & Liu, T. T. A component based noise correction method (CompCor) for BOLD and perfusion based fMRI. *Neuroimage* **37**, 90-101, doi:10.1016/j.neuroimage.2007.04.042 (2007).
- 5 Smith, S. M. & Brady, J. M. SUSAN—A New Approach to Low Level Image Processing. *International Journal of Computer Vision* **23**, 45-78, doi:10.1023/A:1007963824710 (1997).
- 6 Pruim, R. H. R. *et al.* ICA-AROMA: A robust ICA-based strategy for removing motion artifacts from fMRI data. *Neuroimage* **112**, 267-277, doi:10.1016/j.neuroimage.2015.02.064 (2015).
- 7 Ciric, R. *et al.* Benchmarking of participant-level confound regression strategies for the control of motion artifact in studies of functional connectivity. *NeuroImage* **154**, 174-187, doi:<https://doi.org/10.1016/j.neuroimage.2017.03.020> (2017).
